# Supplementary material for: Blockade of TLR3 protects mice from lethal radiation-induced gastrointestinal syndrome
Source: PubMed Central journal article supplement — Nat Commun. 2014 Mar 18;5:3492. doi: 10.1038/ncomms4492 (PMC3959210; doi:10.1038/ncomms4492), 2014-03-18
Supplement: ncomms4492-s1.pdf [file ncomms4492-s1.pdf]

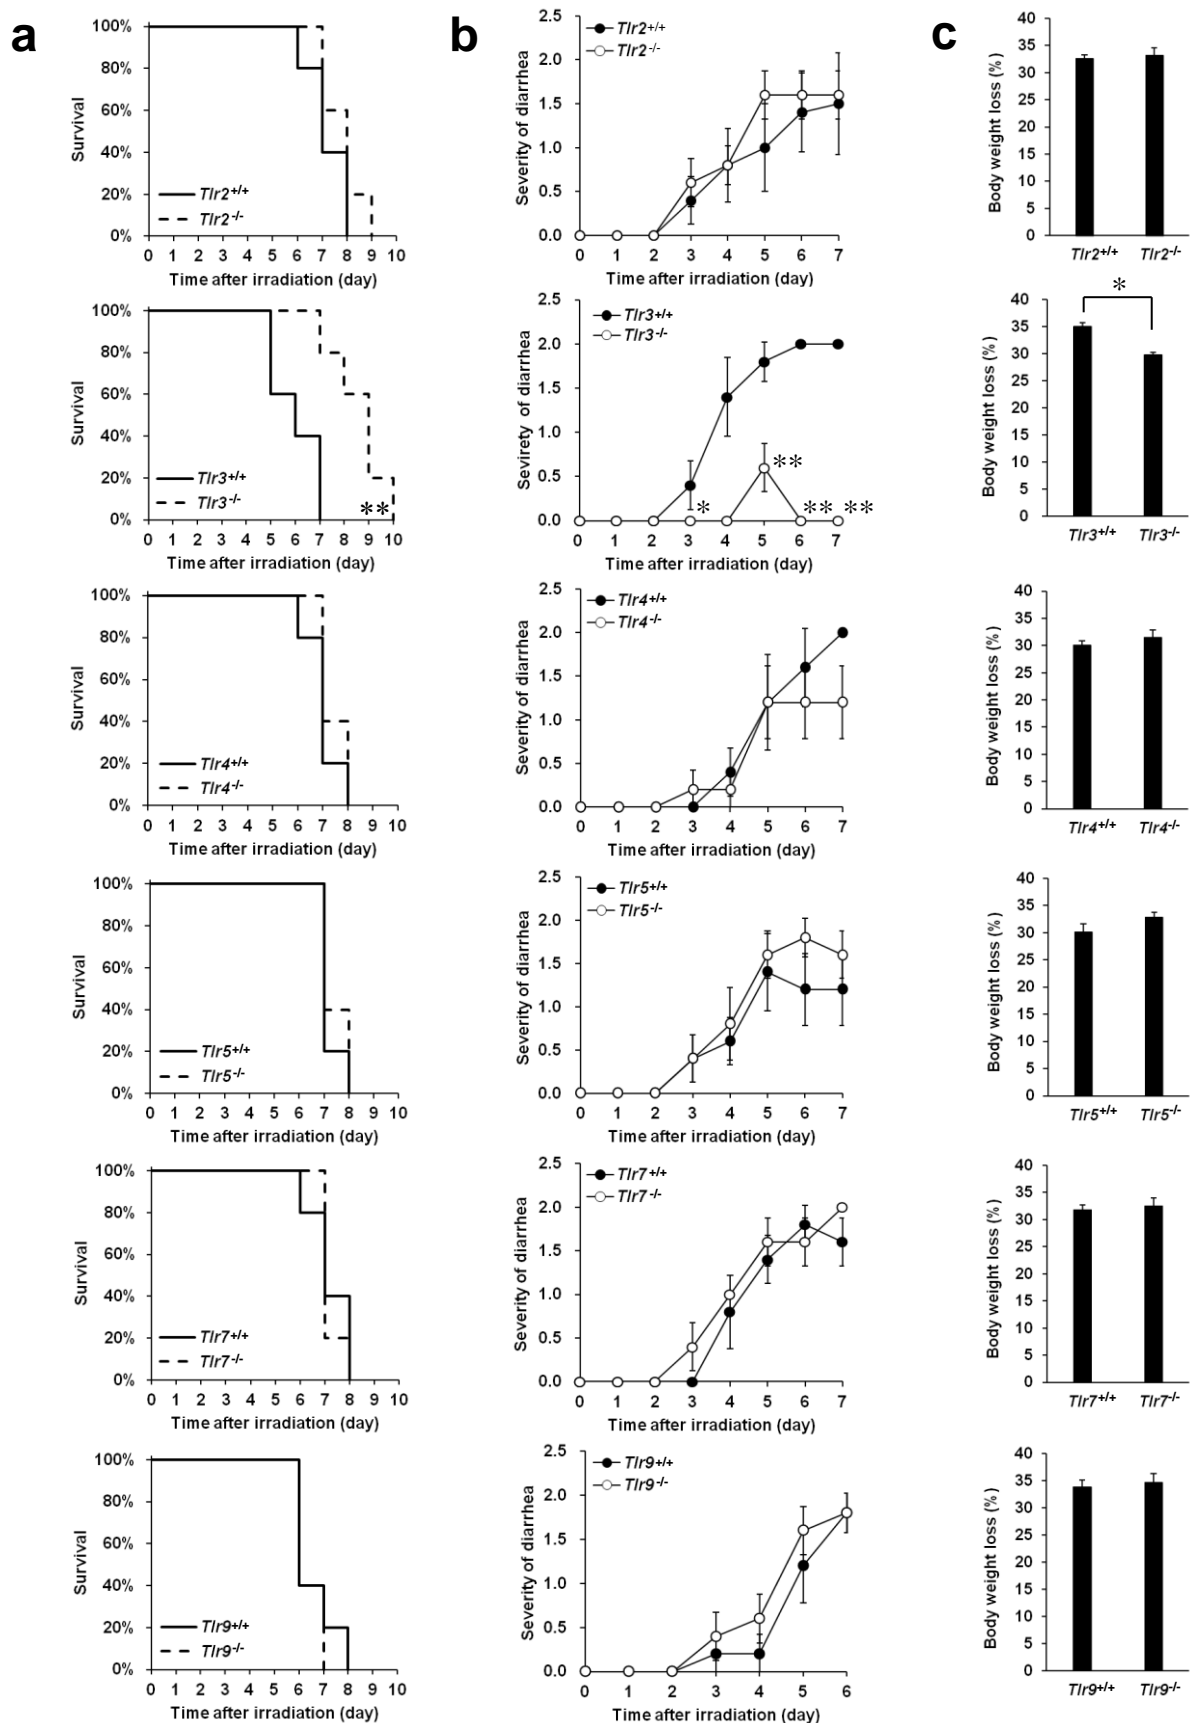

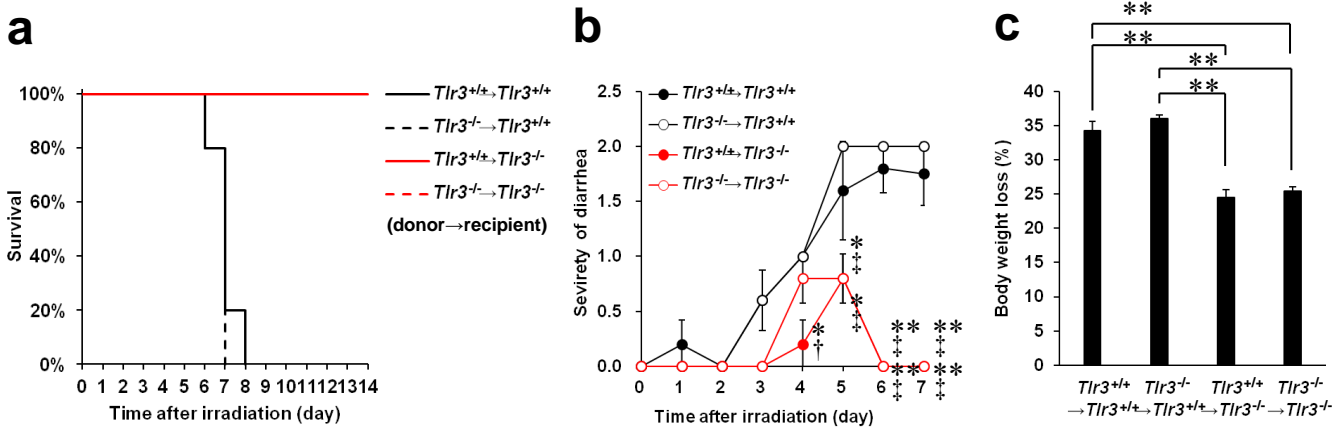

**Supplementary Figure 2. Manifestations of radiation-induced GIS of mice received BM cells from  $Tlr3^{+/+}$  and  $Tlr3^{-/-}$  mice.**

$Tlr3^{+/+}$  and  $Tlr3^{-/-}$  mice were treated with TBI. Subsequently, mice received a single intravenous injection of BM cells obtained from  $Tlr3^{+/+}$  or  $Tlr3^{-/-}$  mice. **(a)** Kaplan-Meier survival analyses of  $Tlr3^{+/+}$  or  $Tlr3^{-/-}$  mice.  $n=5$ . **(b)** Severity of diarrhea of  $Tlr3^{+/+}$  or  $Tlr3^{-/-}$  mice.  $n=5$ . Results are means  $\pm$  SEM. \*,  $P<0.05$ . \*\*,  $P<0.01$  (vs  $Tlr3^{+/+} \rightarrow Tlr3^{+/+}$ ), †,  $P<0.05$ , ‡,  $P<0.01$  (vs  $Tlr3^{-/-} \rightarrow Tlr3^{+/+}$ ) (unpaired two-tailed Student's  $t$ -test) **(c)** Body weight loss of  $Tlr3^{+/+}$  or  $Tlr3^{-/-}$  mice at day 5. Results are means  $\pm$  SEM.  $n=5$ . \*,  $P<0.05$ . (unpaired two-tailed Student's  $t$ -test).

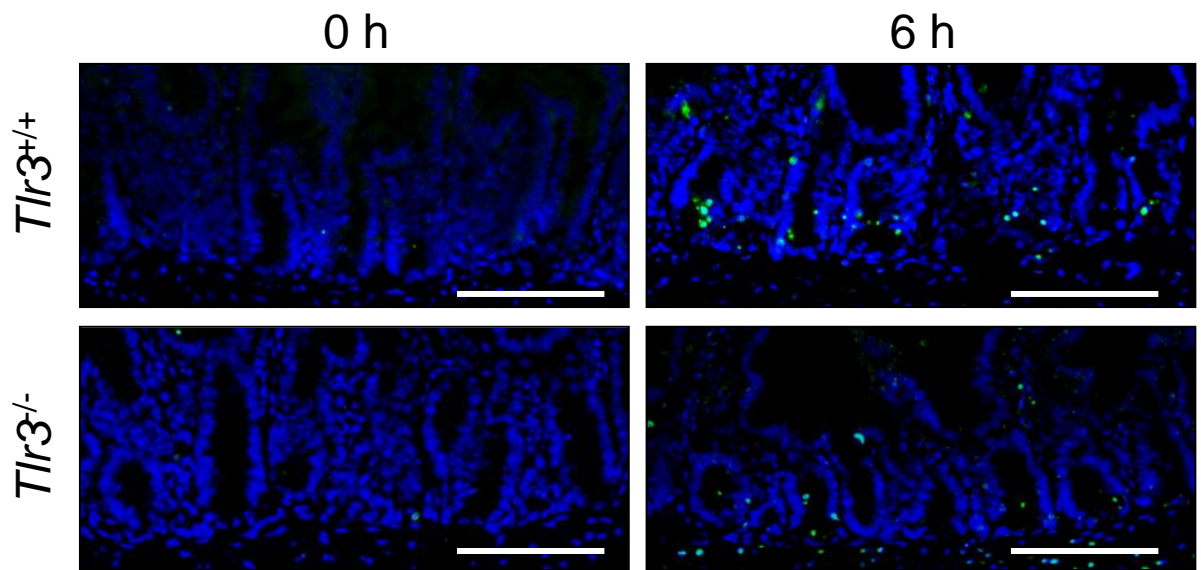

**Supplementary Figure 3. Zoomed images of TUNEL-staining of small intestinal crypt after irradiation.**

TUNEL-staining of the small intestines of *Tlr3*<sup>+/+</sup> and *Tlr3*<sup>-/-</sup> mice 0 and 6 h after 10-Gy TBI. TUNEL-stained epithelium shows green fluorescence. Nuclei were stained with DAPI (blue). Scale bar; 100  $\mu$ m.

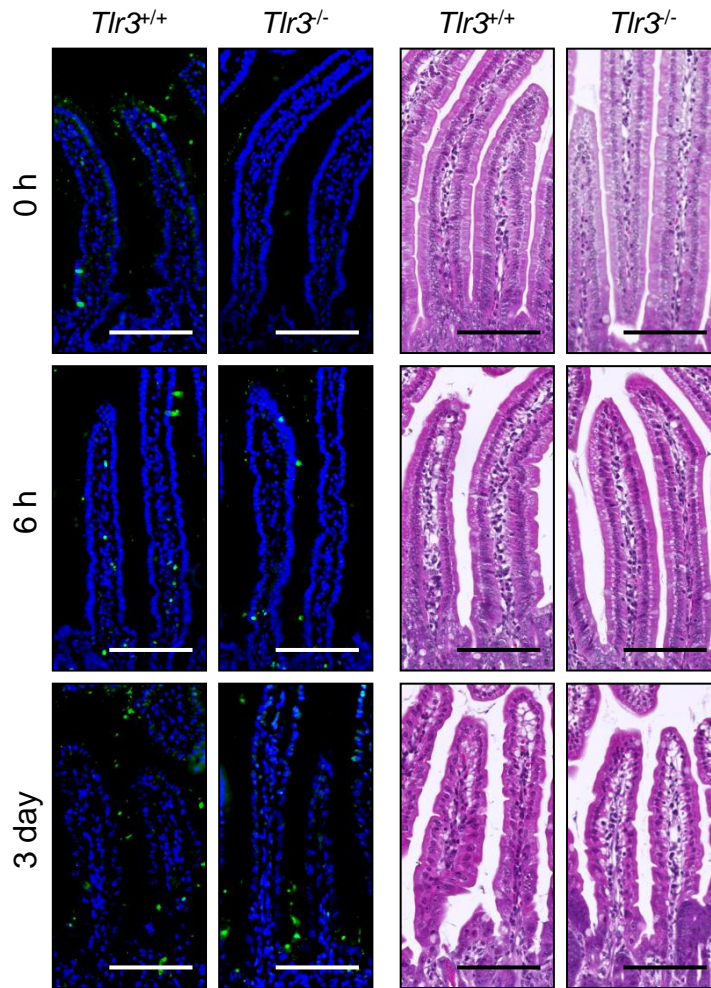

**Supplementary Figure 4. Histological observation of small intestinal villi of *Tlr3*<sup>+/+</sup> and *Tlr3*<sup>-/-</sup> mice after TBI.**

H&E and TUNEL staining of small intestinal villi of *Tlr3*<sup>+/+</sup> and *Tlr3*<sup>-/-</sup> mice 0 and 6 h and 3 day. TUNEL-stained epithelium shows green fluorescence. Nuclei were stained with DAPI (blue). Scale bar; 100  $\mu$ m.

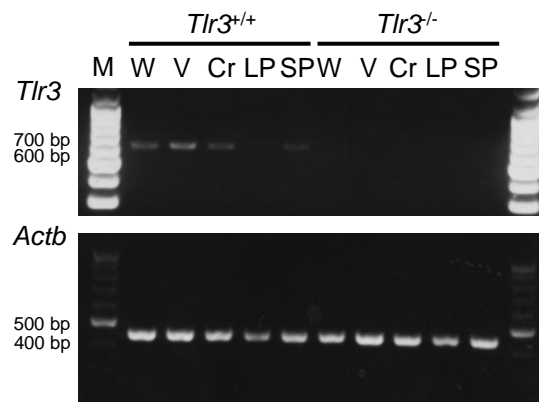

**Supplementary Figure 5. Full images of gel electrophoresis.**

RT-PCR of *Tlr3* mRNA in the small intestines of *Tlr3*<sup>+/+</sup> and *Tlr3*<sup>-/-</sup> mice. M, size marker; W, whole intestine; V, villi; Cr, crypt; LP, lamina propria; SP, spleen.

**a**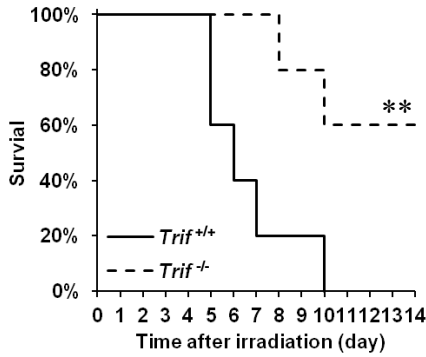**b**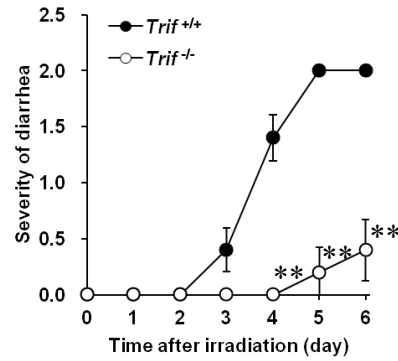**c**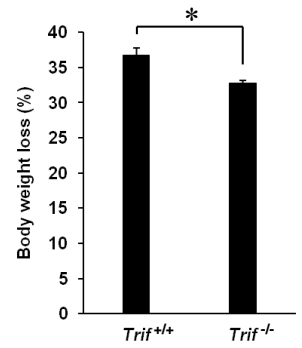

### Supplementary Figure 6. Manifestations of radiation-induced GIS of *Trif*<sup>-/-</sup> mice.

*Trif*<sup>+/+</sup> and *Trif*<sup>-/-</sup> mice were treated with TBI and isologous BMT. (a) Kaplan-Meier survival analyses of *Trif*<sup>+/+</sup> and *Trif*<sup>-/-</sup> mice. *n*=5. \*\*, *P*<0.01. (log-rank test) (b) Severity of diarrhea of *Trif*<sup>+/+</sup> and *Trif*<sup>-/-</sup> mice. *n*=5. Results are means ± SEM. \*\*, *P*<0.01. (unpaired two-tailed Student's *t*-test) (c) Body weight loss of *Trif*<sup>+/+</sup> and *Trif*<sup>-/-</sup> mice at day 5. Results are means ± SEM. *n*=5. \*, *P*<0.05. (unpaired two-tailed Student's *t*-test).

**a**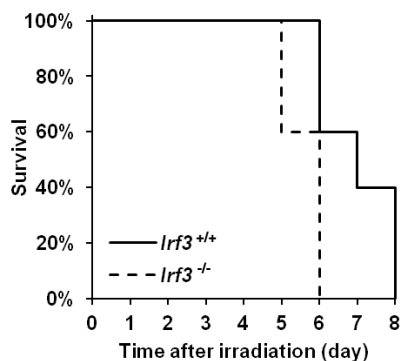**b**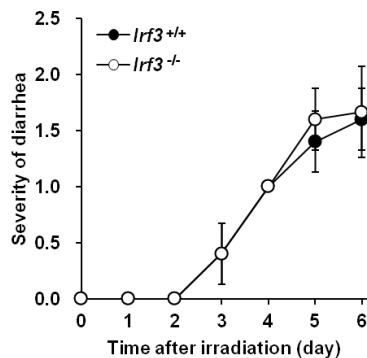**c**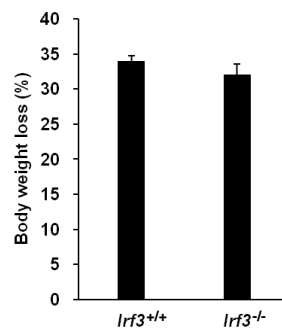

**Supplementary Figure 7. Manifestations of radiation-induced GIS of *lrf3*<sup>-/-</sup> mice.**

*lrf3*<sup>+/+</sup> and *lrf3*<sup>-/-</sup> mice were treated with TBI and isologous BMT. **(a)** Kaplan-Meier survival analyses of *lrf3*<sup>+/+</sup> and *lrf3*<sup>-/-</sup> mice. *n*=5. **(b)** Severity of diarrhea of *lrf3*<sup>+/+</sup> and *lrf3*<sup>-/-</sup> mice. *n*=5. Results are means  $\pm$  SEM. **(c)** Body weight loss of *lrf3*<sup>+/+</sup> and *lrf3*<sup>-/-</sup> mice at day 5. *n*=5. Results are means  $\pm$  SEM.

**a**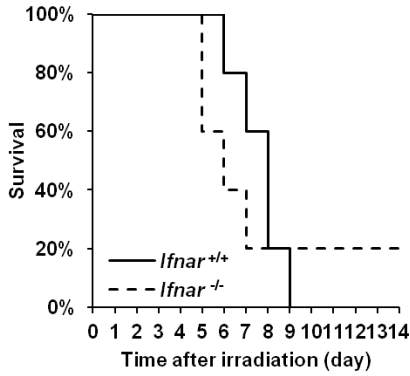**b**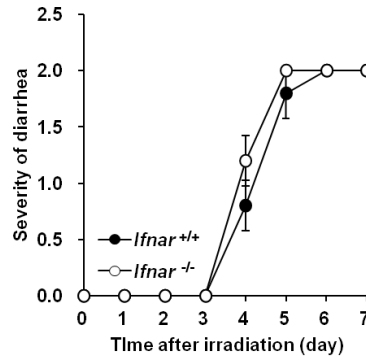**c**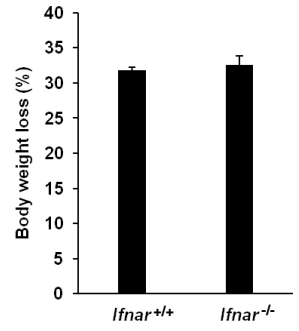

**Supplementary Figure 8. Manifestations of radiation-induced GIS of *Ifnar*<sup>-/-</sup> mice.**

*Ifnar*<sup>+/+</sup> and *Ifnar*<sup>-/-</sup> mice were treated with TBI and isologous BMT. **(a)** Kaplan-Meier survival analyses of *Ifnar*<sup>+/+</sup> and *Ifnar*<sup>-/-</sup> mice. *n*=5. **(b)** Severity of diarrhea of *Ifnar*<sup>+/+</sup> and *Ifnar*<sup>-/-</sup> mice. *n*=5. Results are means  $\pm$  SEM. **(c)** Body weight loss of *Ifnar*<sup>+/+</sup> and *Ifnar*<sup>-/-</sup> mice at day 5. *n*=5. Results are means  $\pm$  SEM.

**a**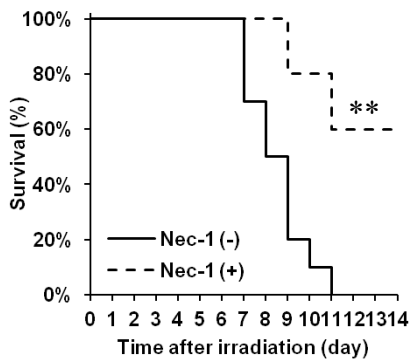**b**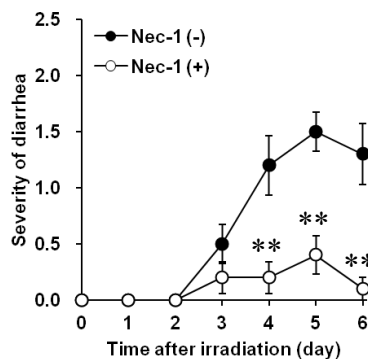**c**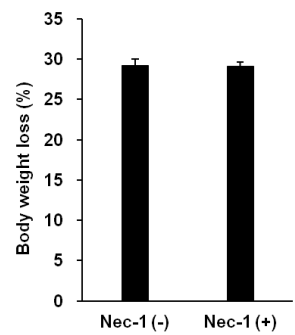

### Supplementary Figure 9. Manifestations of radiation-induced GIS of Nec-1-treated mice.

Nec-1-treated mice were treated with TBI and isologous BMT. **(a)** Kaplan-Meier survival analyses of non-treated and Nec-1-treated mice after TBI and isologous BMT.  $n=10$ . \*\*,  $P<0.01$ . (log-rank test) **(b)** Severity of diarrhea of non-treated and Nec-1-treated mice.  $n=10$ . Results are means  $\pm$  SEM. \*\*,  $P<0.01$ . (unpaired two-tailed Student's  $t$ -test) **(c)** Body weight loss of non-treated and Nec-1-treated mice at day 5.  $n=10$ . Results are means  $\pm$  SEM.

*Tlr3<sup>+/+</sup>**Tlr3<sup>-/-</sup>*

Non-treated

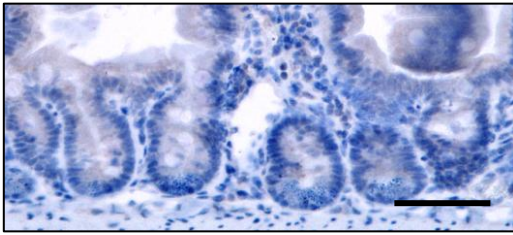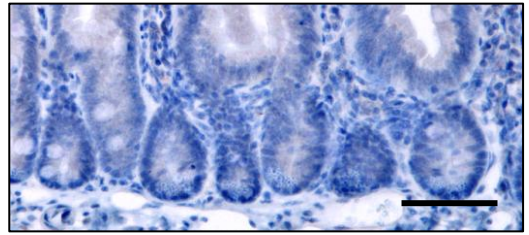

Poly (I:C)-treated

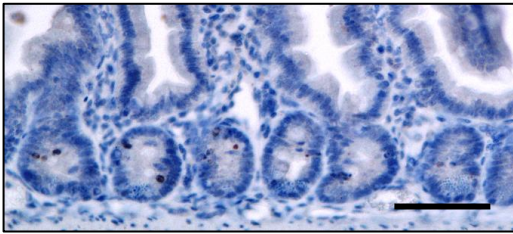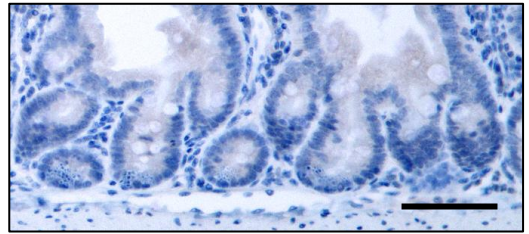

Irradiated

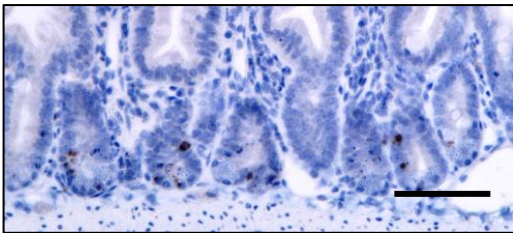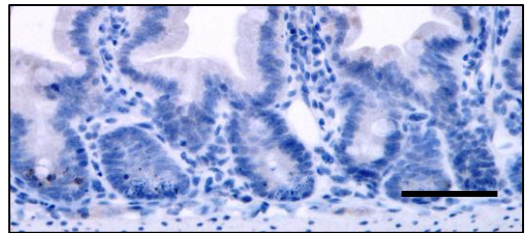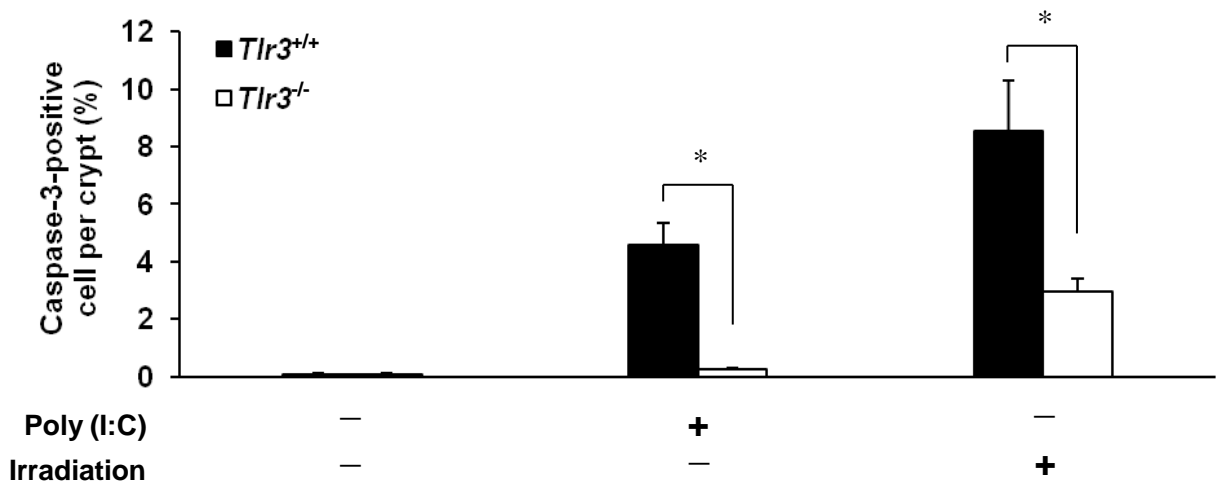**Supplementary Figure 10. TLR3-dependent crypt cell death is mediated by caspase-3**

Immunohistochemical detection of active caspase-3 in the small intestinal crypts of *Tlr3<sup>+/+</sup>* and *Tlr3<sup>-/-</sup>* mice 6 h after TBI or intraperitoneal injection of poly I:C. Active caspase-3-positive cells are stained in brown. Scale bar; 100  $\mu$ m. Lower panel shows numbers of active caspase-3-positive cells.  $n=3$ . Results are means  $\pm$  SEM. \*,  $P<0.05$ . (unpaired two-tailed Student's  $t$ -test).

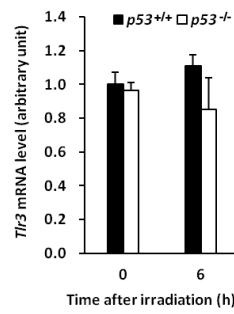

**Supplementary Figure 11. *Tlr3* mRNA expression in crypt cells of *p53*<sup>+/+</sup> and *p53*<sup>-/-</sup> mice.** Quantitative real-time PCR of *Tlr3* mRNA expression in crypt cells of *p53*<sup>+/+</sup> and *p53*<sup>-/-</sup> mice. *n*=3. Results are means  $\pm$  SEM.

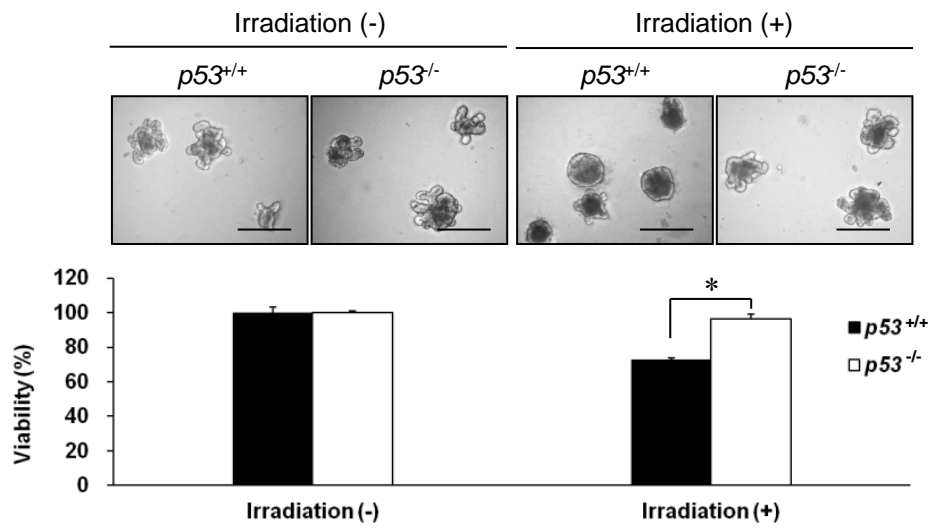

**Supplementary Figure 12. Radiation induces p53-dependent cell death in crypt-villus organoid.** Representative images of crypt-villus organoids of *p53*<sup>+/+</sup> and *p53*<sup>-/-</sup> mice on day 1 after irradiation. Scale bar; 200  $\mu$ m. Lower panel shows the viability. Viability was measured in triplicate. Results are means  $\pm$  SEM. \*,  $P < 0.05$  (unpaired two-tailed Student's *t*-test)

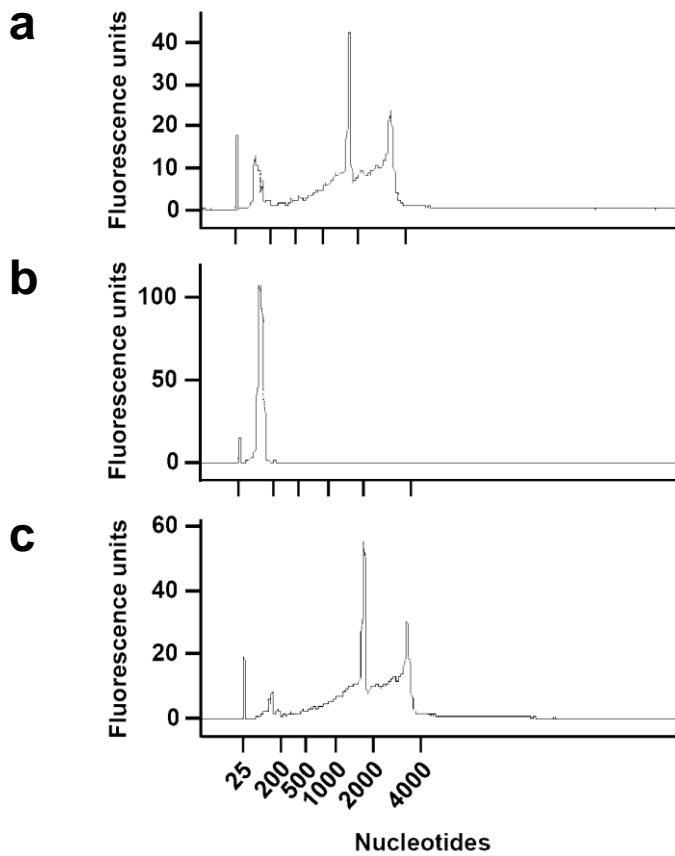

**Supplementary Figure 13. Confirmation of the sizes of small and large RNA prepared from irradiated small intestine.**  
Bioanalyzer graphical data of the size distribution of (a) total RNA, (b) small RNA, and (c) large RNA prepared from irradiated small intestine. The peak at 25-nt is an internal standard.

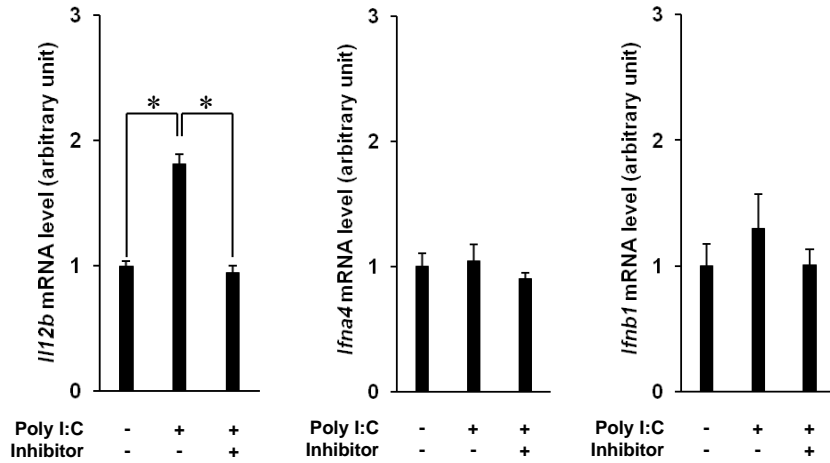

**Supplementary Figure 14. Effects of TLR3/dsRNA complex inhibitor on poly I:C-induced expressions of cytokine mRNA of CD8 $\alpha^+$  splenic dendritic cells.** CD8 $\alpha^+$  splenic dendritic cells were pretreated with TLR3/dsRNA complex inhibitor for 1 h before stimulation with poly I:C. After 12 h of incubation, expression levels of mRNA encoding IL-12p40, IFN- $\alpha$ 4, and IFN- $\beta$  were measured in triplicate. Results are means  $\pm$  SEM. \*,  $P < 0.05$  (unpaired two-tailed Student's  $t$ -test)
